# Supplementary material
Source: ML conference proceedings conference paper supplement (https://openreview.net/forum?id=P1KhPUTceF)
Supplement: supplementary_material [file tsne_plots_ab1.pdf › S4SN/res/save/tsne_plots_ab1.pdf]

Time-step 0

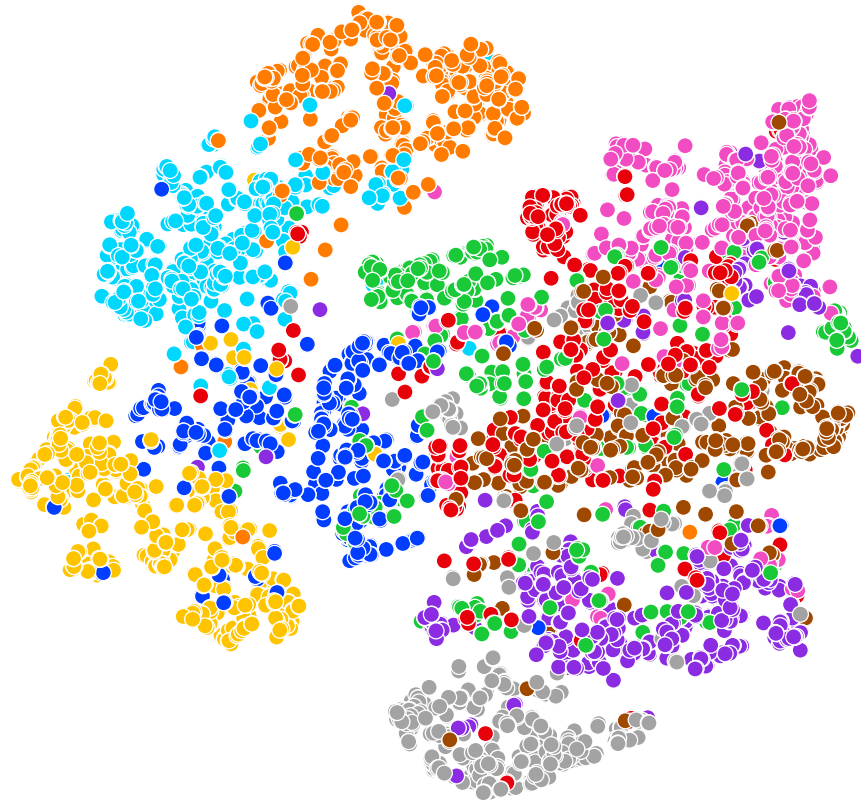

Time-step 1

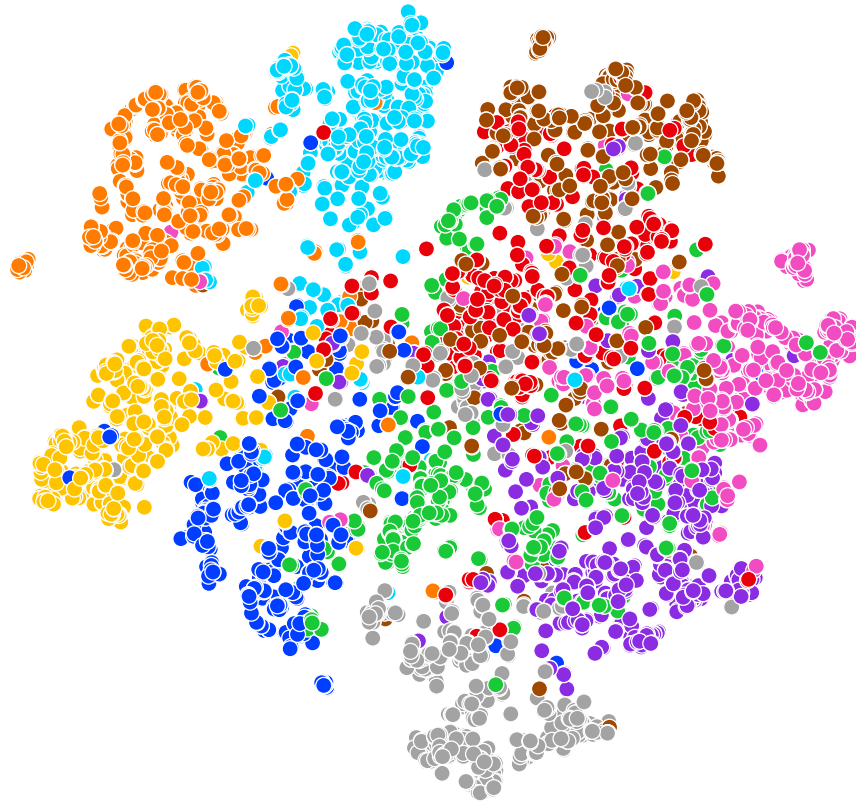

Time-step 2

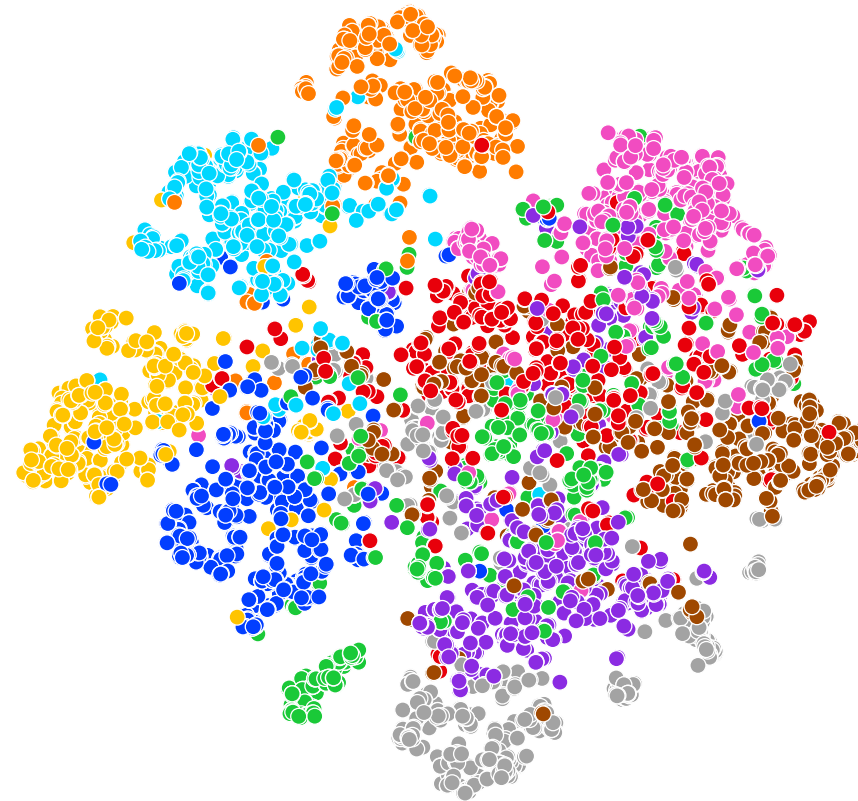

Time-step 3

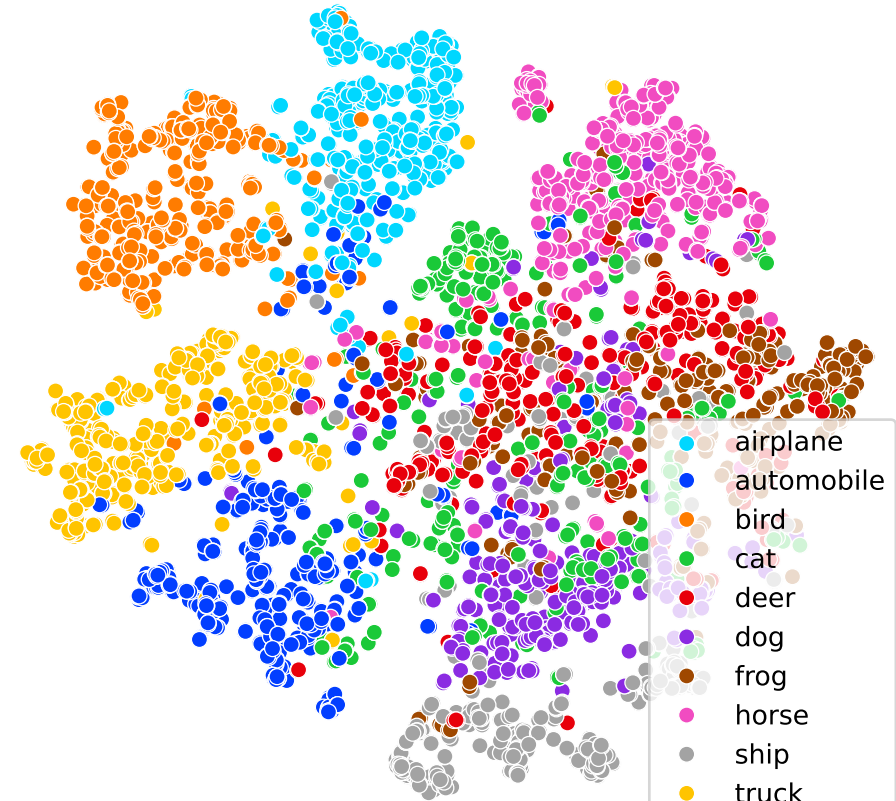

- airplane
- automobile
- bird
- cat
- deer
- dog
- frog
- horse
- ship
- truck
