# Supplementary material
Source: ML conference proceedings conference paper supplement (https://openreview.net/forum?id=P1KhPUTceF)

Time-step 0

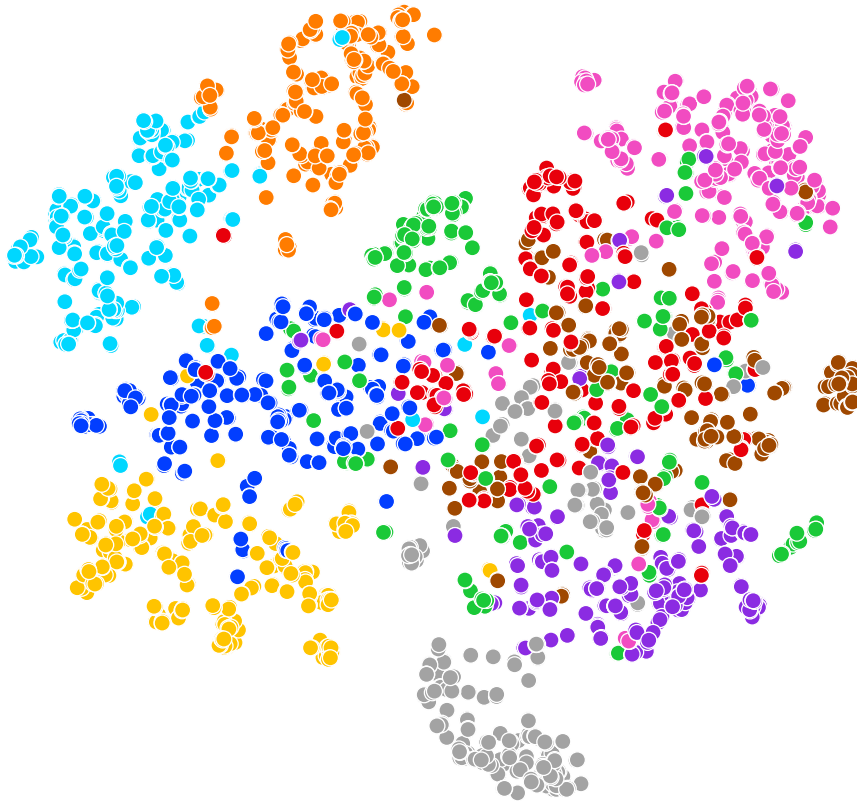

Time-step 1

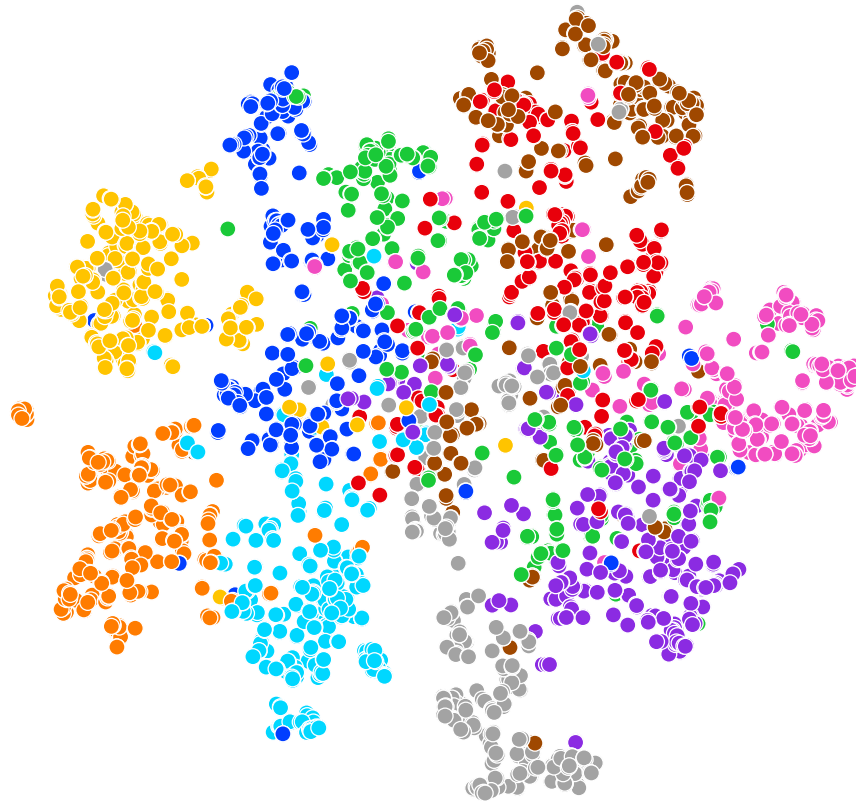

Time-step 2

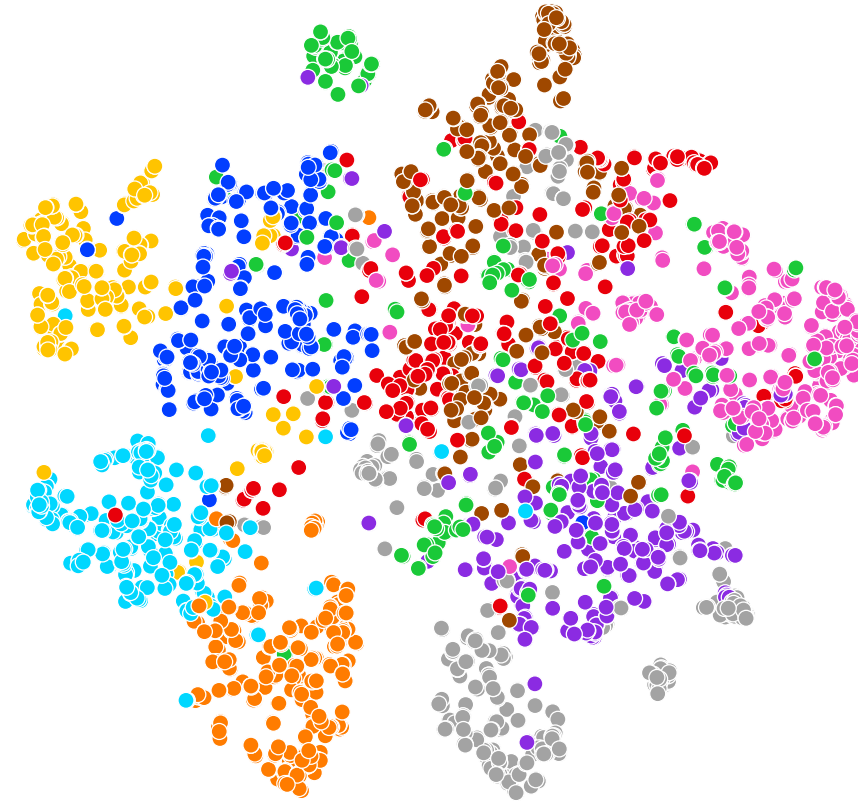

Time-step 3

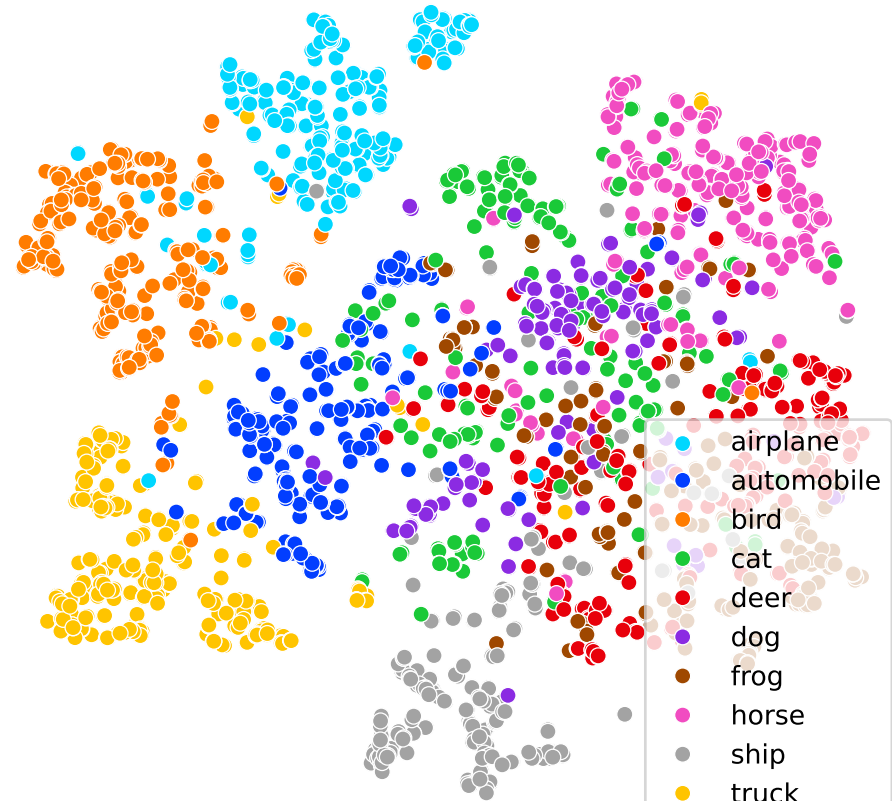

Supplement: supplementary_material [file tsne_plots_ab2_4000.pdf › S4SN/res/save/tsne_plots_ab2_4000.pdf]

Time-step 0

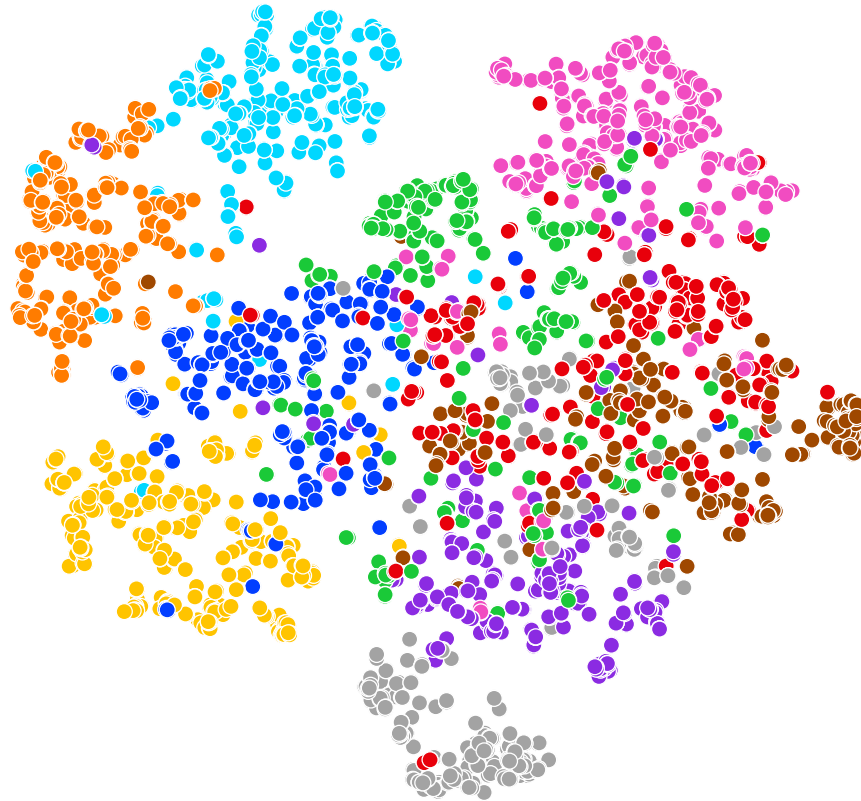

Time-step 1

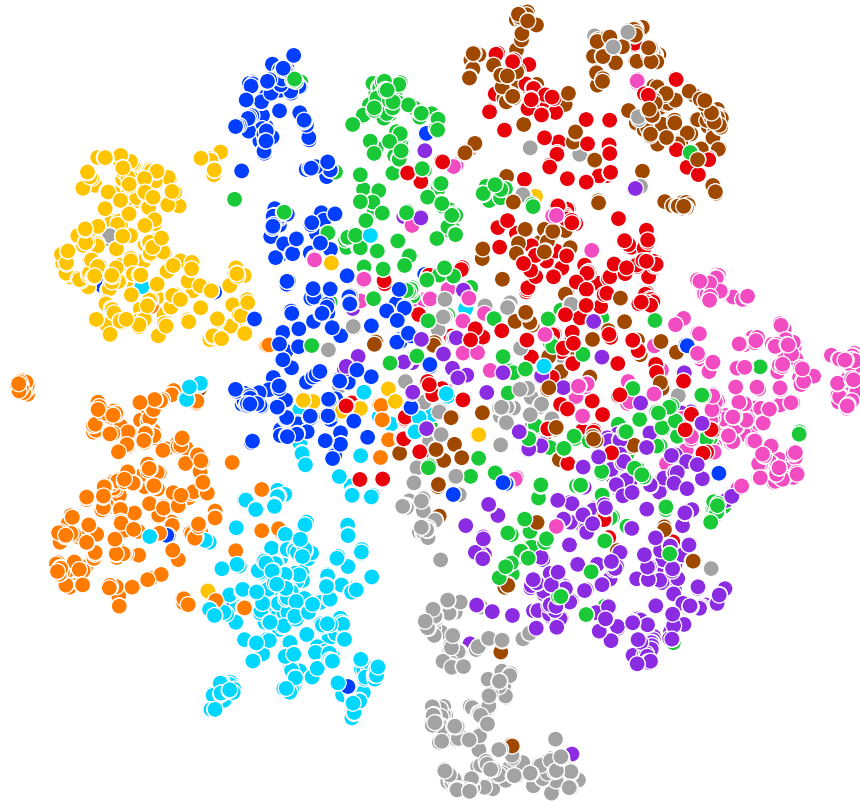

Time-step 2

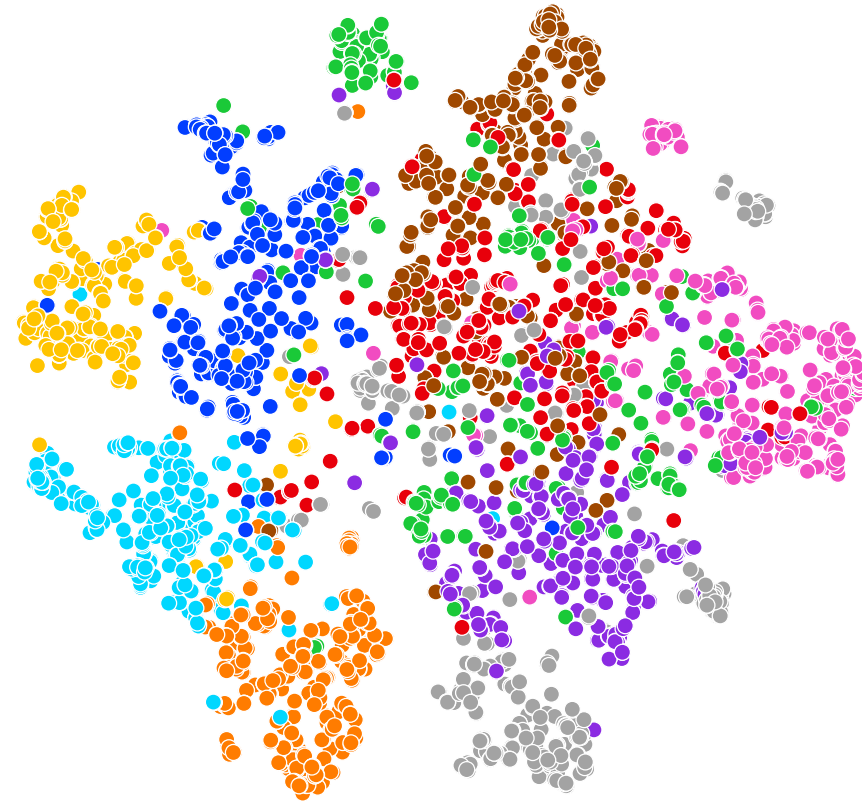

Time-step 3

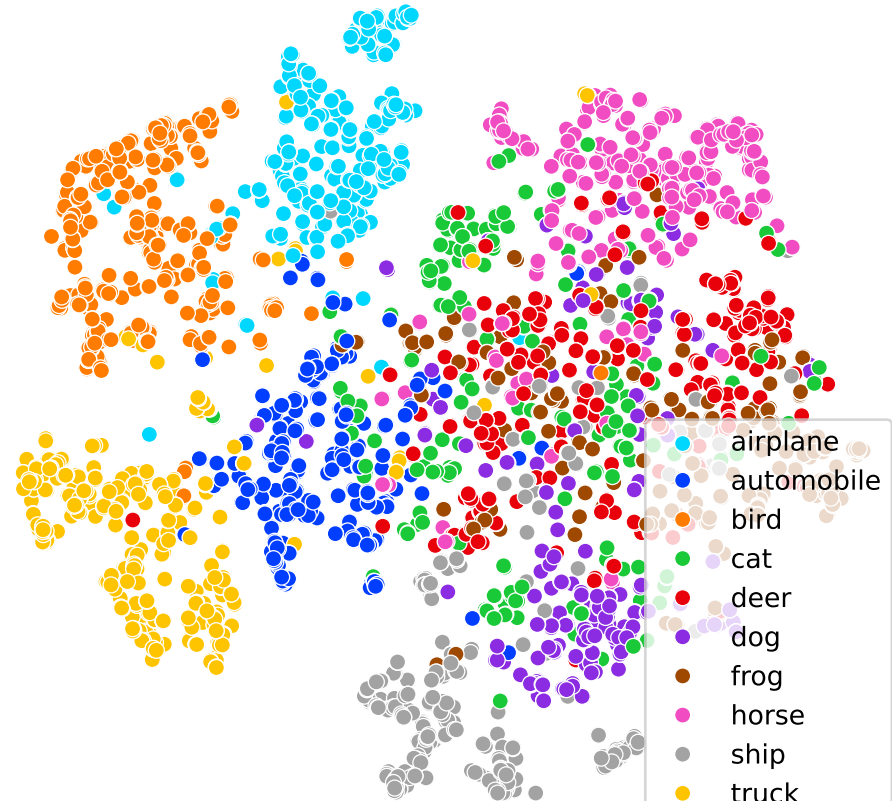

Supplement: supplementary_material [file tsne_plots_ab2_5000.pdf › S4SN/res/save/tsne_plots_ab2_5000.pdf]

Time-step 0

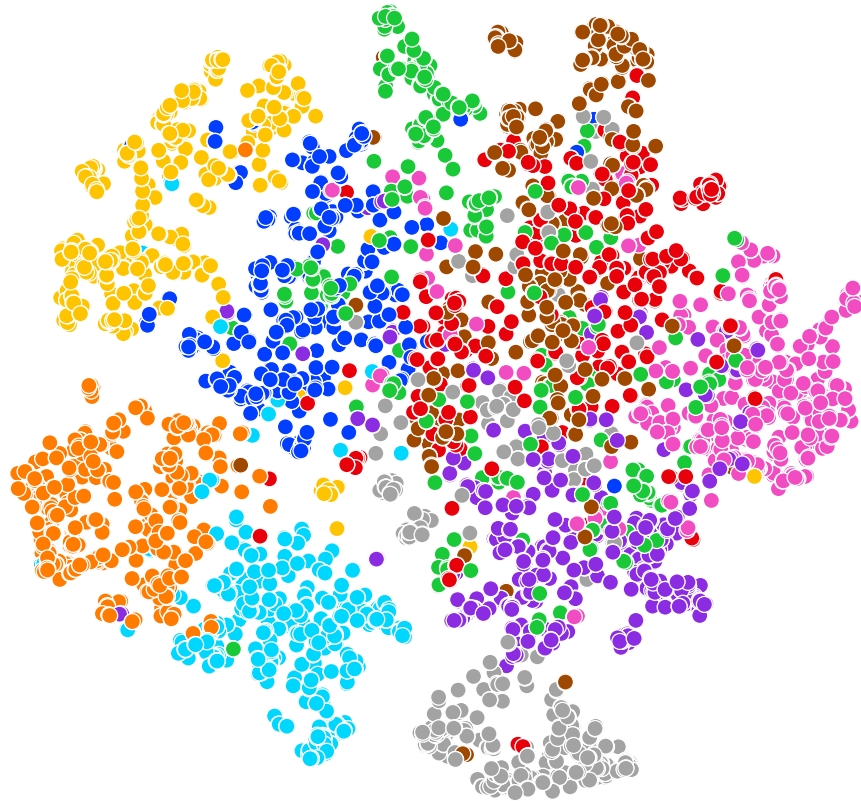

Time-step 1

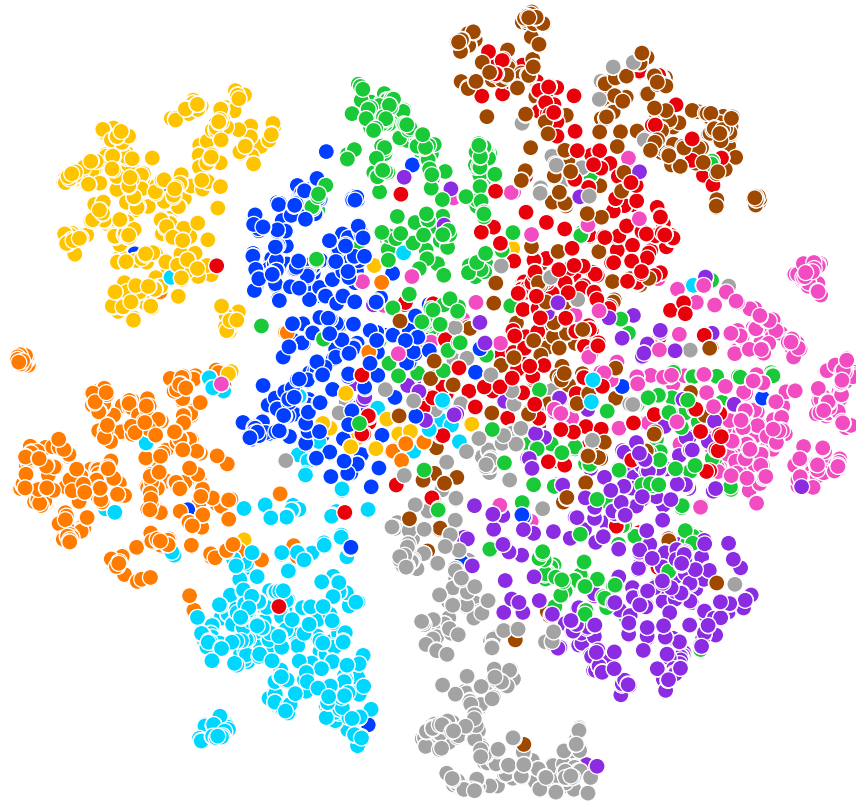

Time-step 2

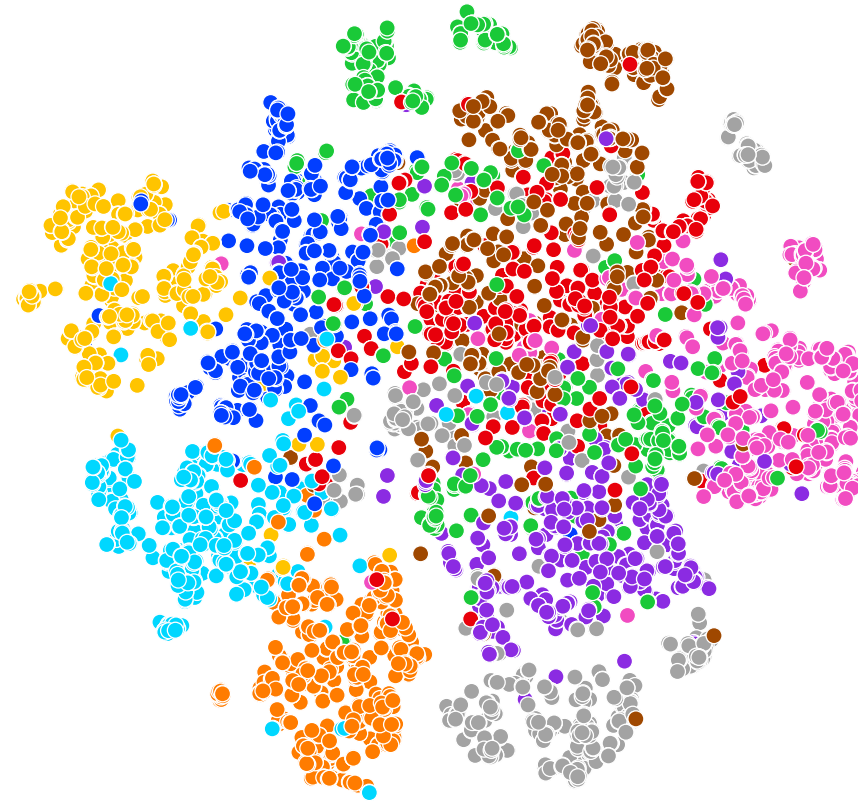

Time-step 3

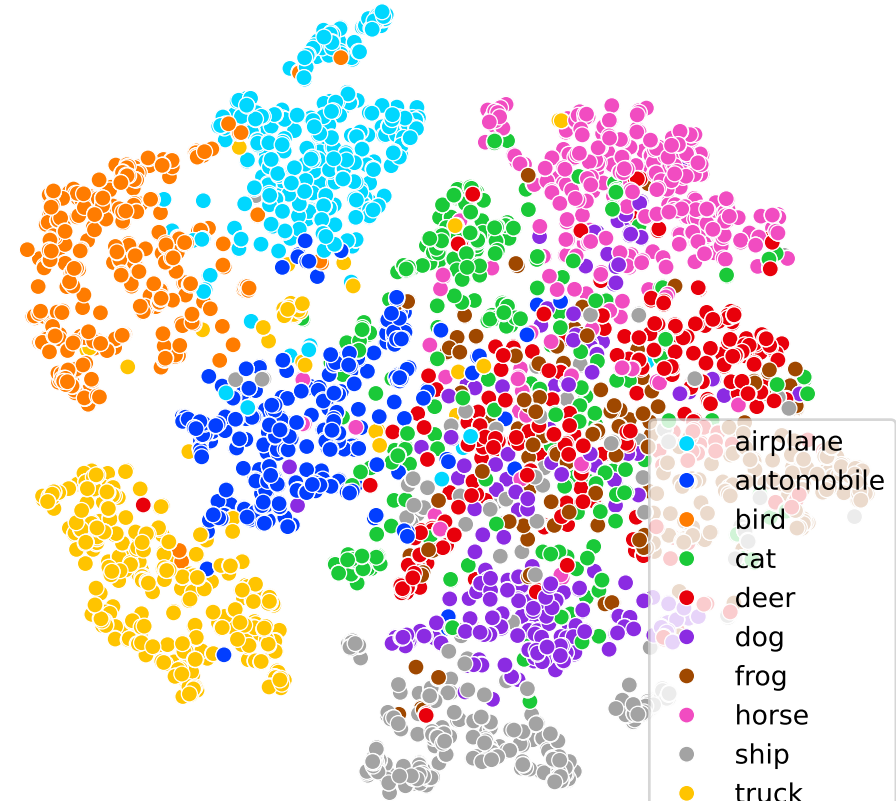

Supplement: supplementary_material [file tsne_plots_ab2_7000.pdf › S4SN/res/save/tsne_plots_ab2_7000.pdf]

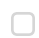

Time-step 0

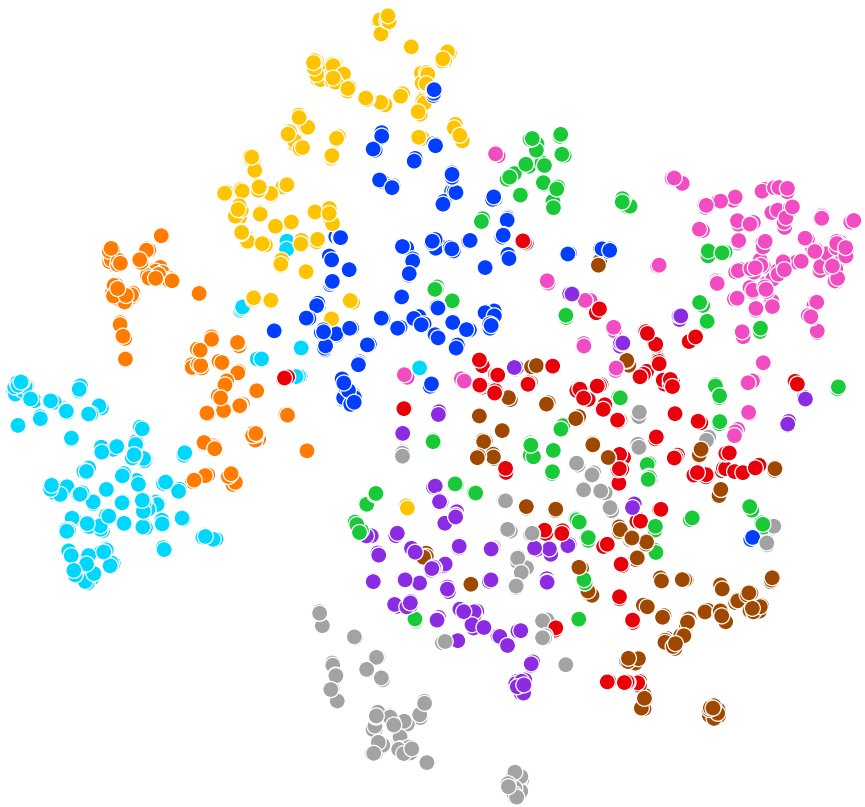

Time-step 1

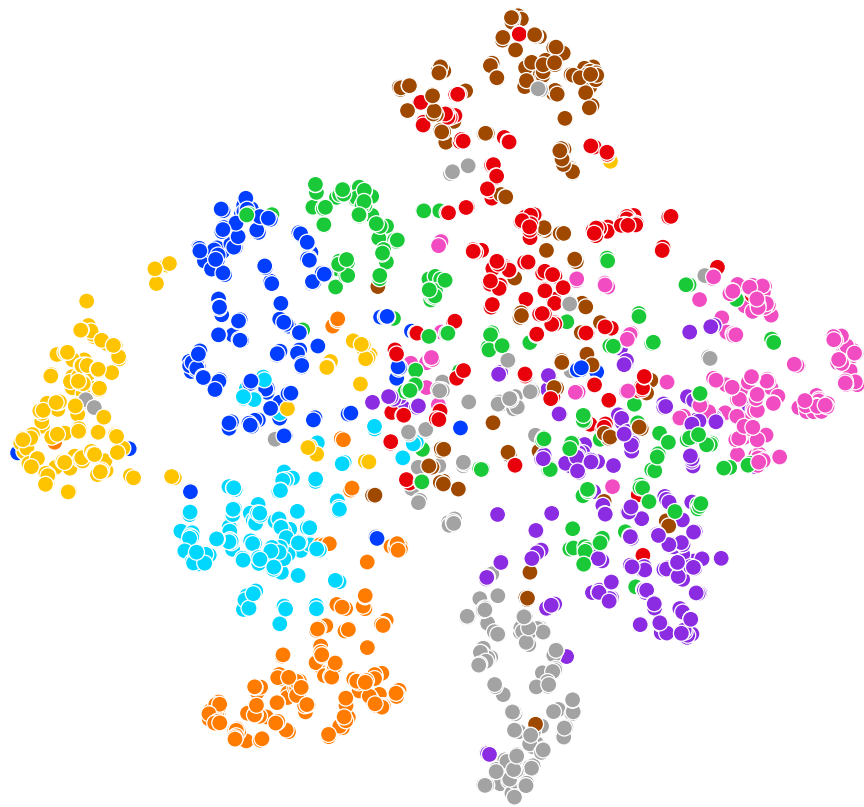

Time-step 2

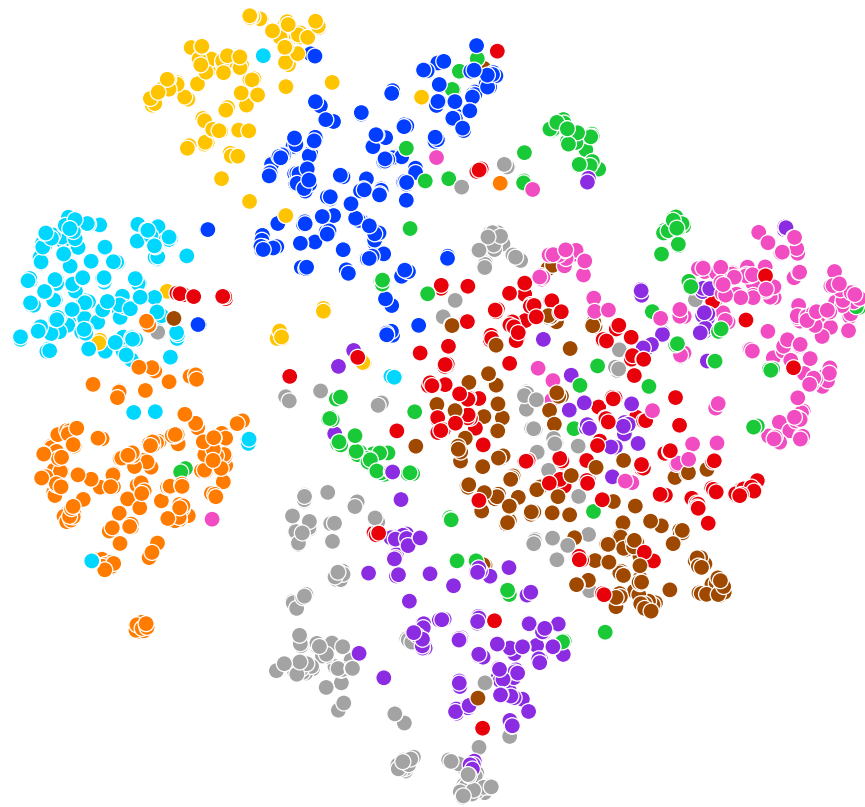

Time-step 3

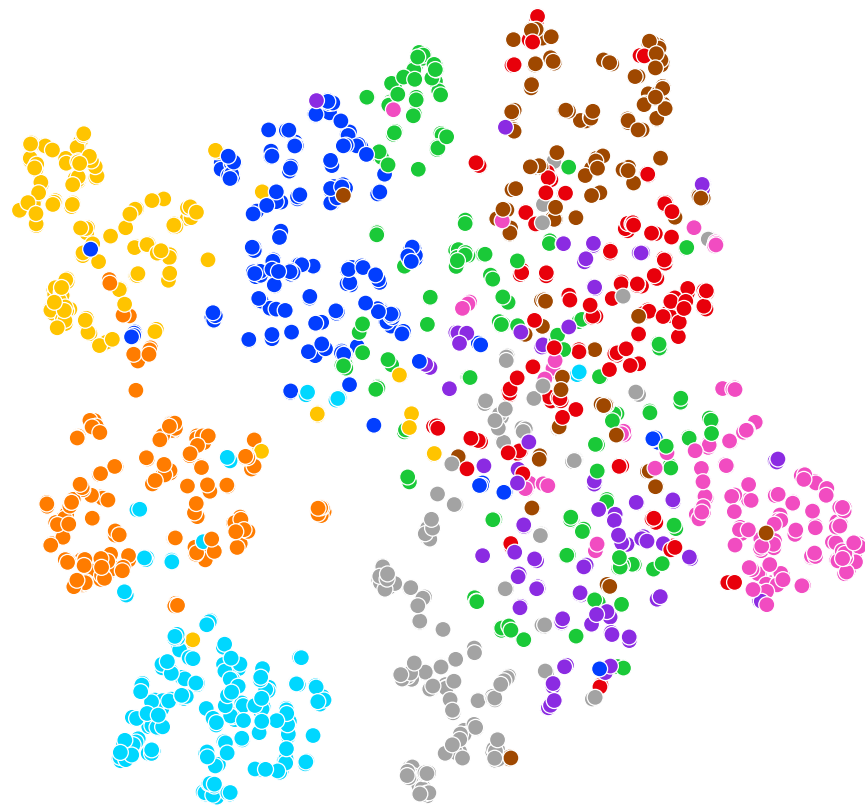

Supplement: supplementary_material [file tsne_plots_ab2_nolegend.pdf › S4SN/res/save/tsne_plots_ab2_nolegend.pdf]

Time-step 0

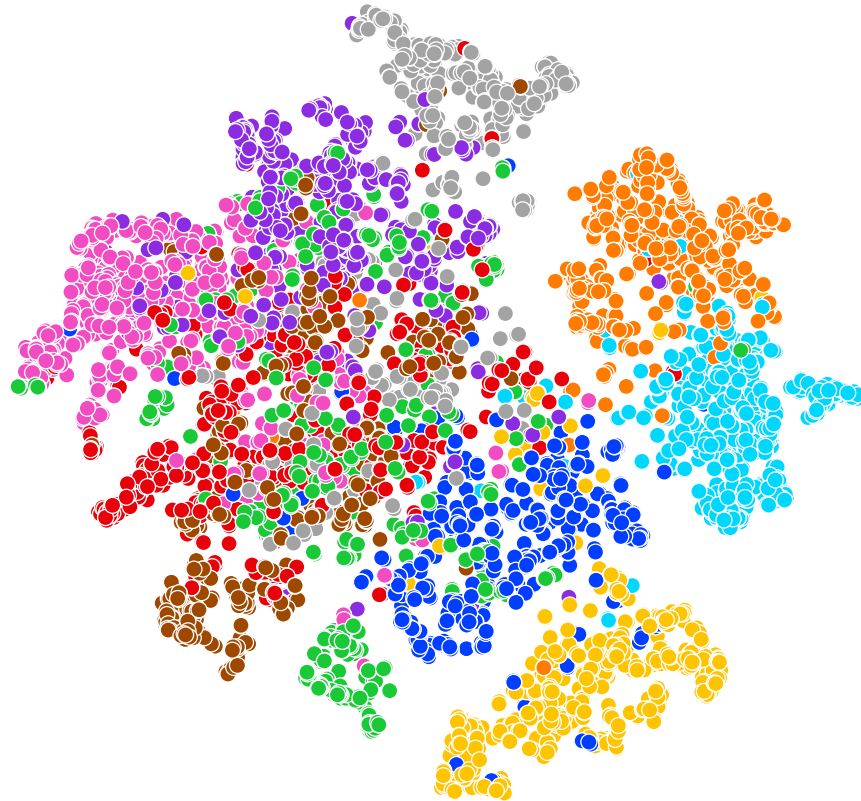

Time-step 1

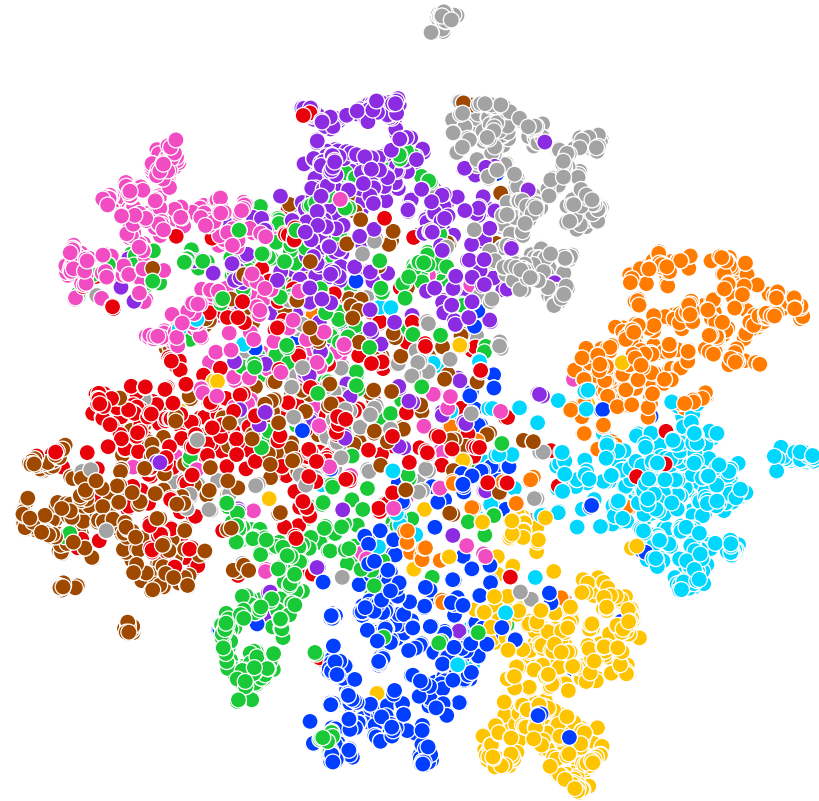

Time-step 2

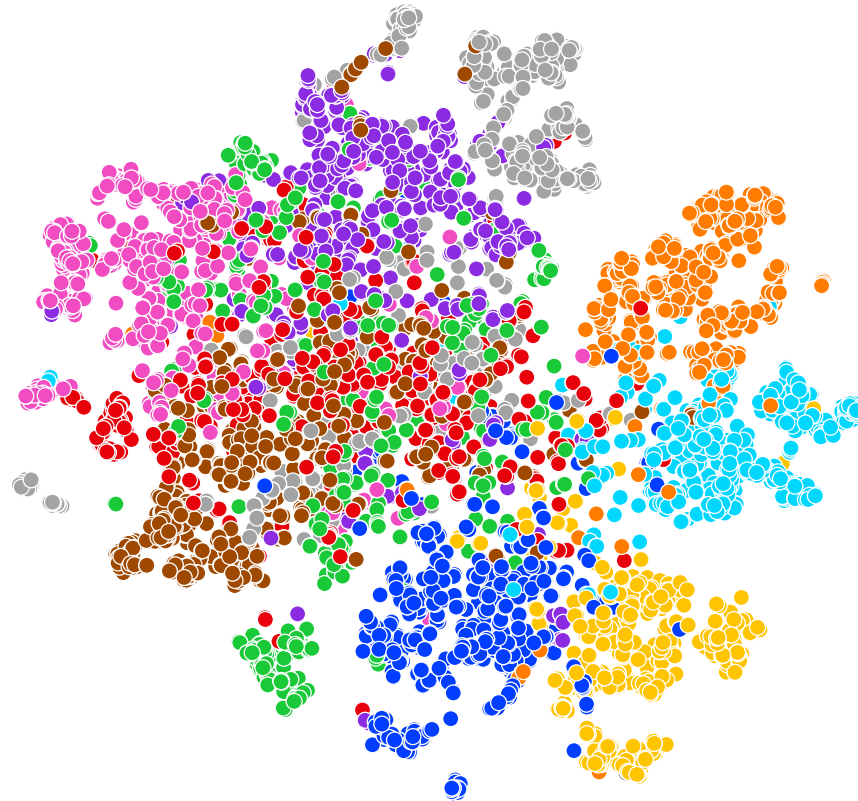

Time-step 3

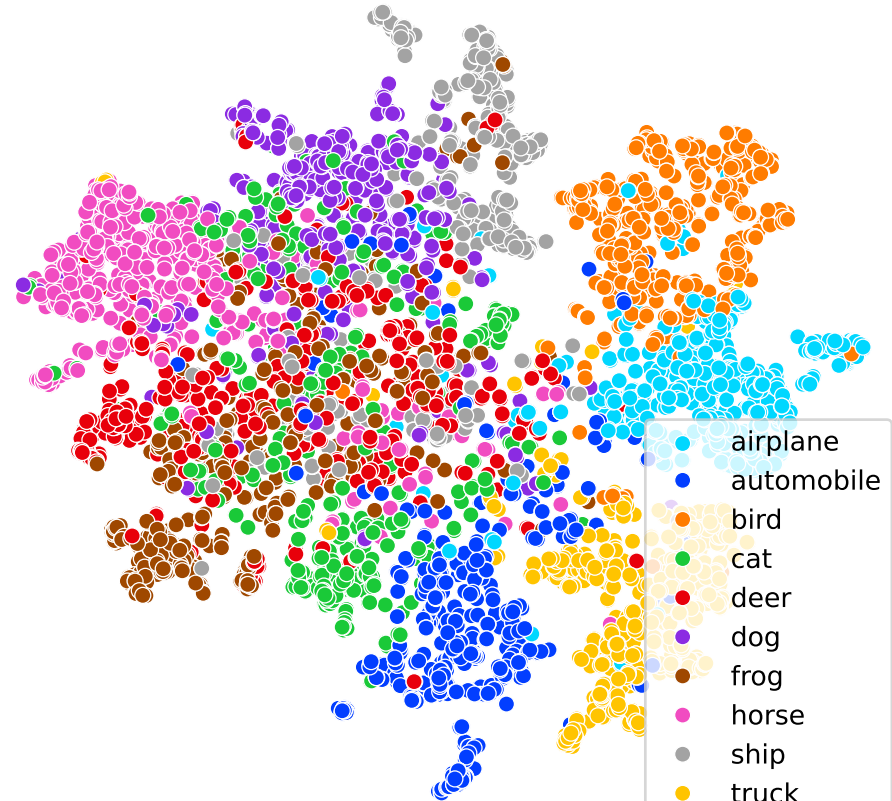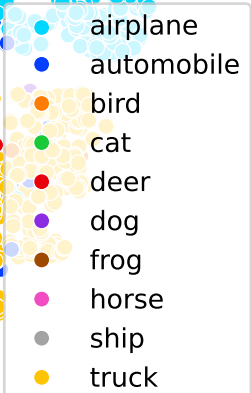

Supplement: supplementary_material [file tsne_plots_ab3.pdf › S4SN/res/save/tsne_plots_ab3.pdf]

Time-step 0

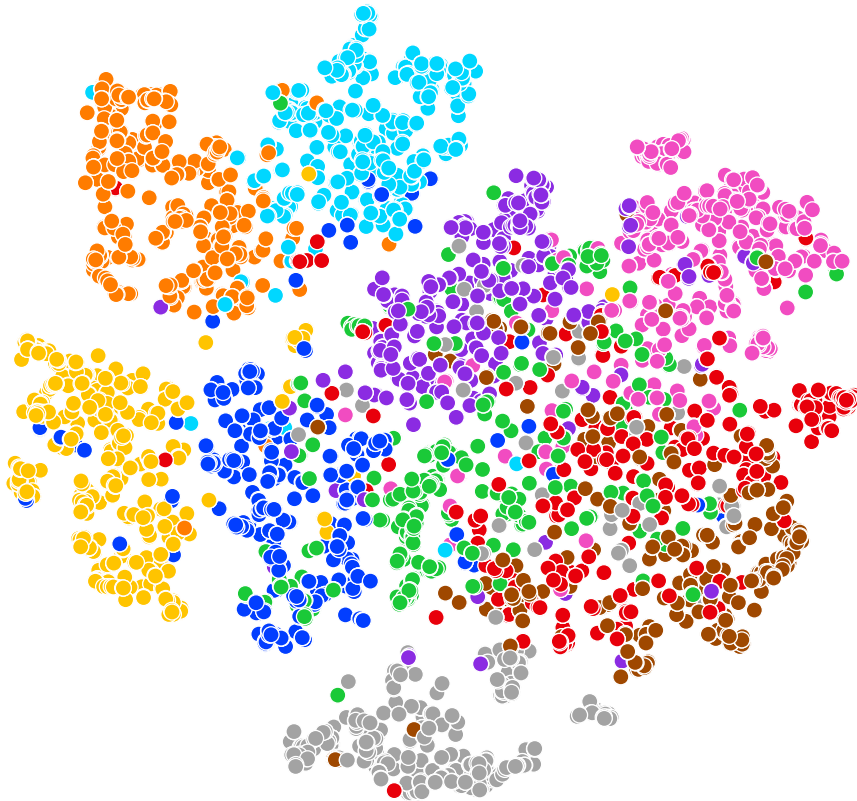

Time-step 1

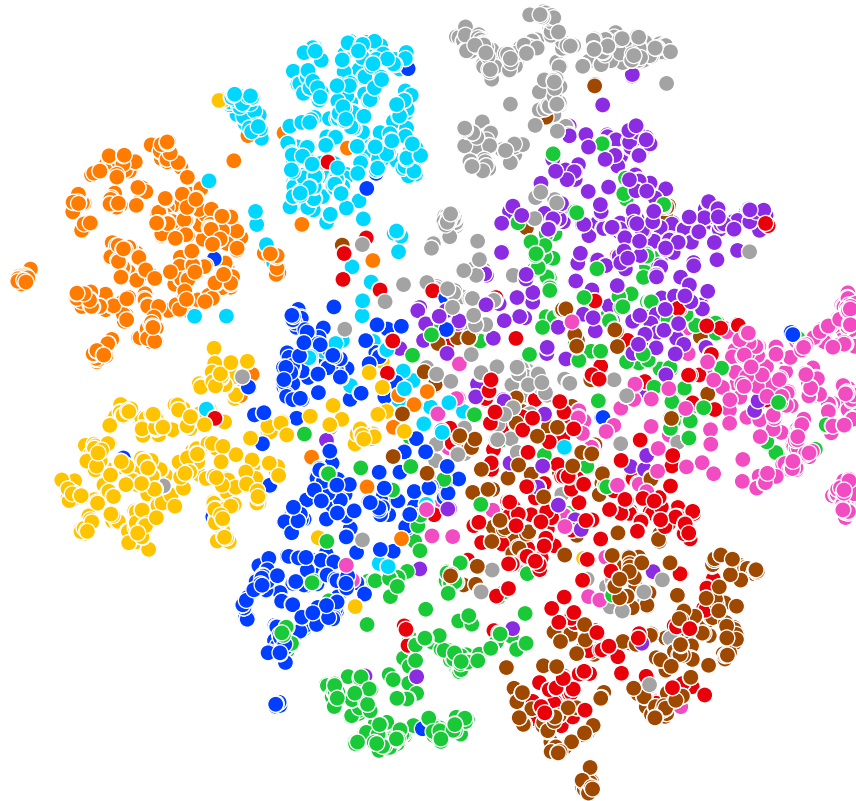

Time-step 2

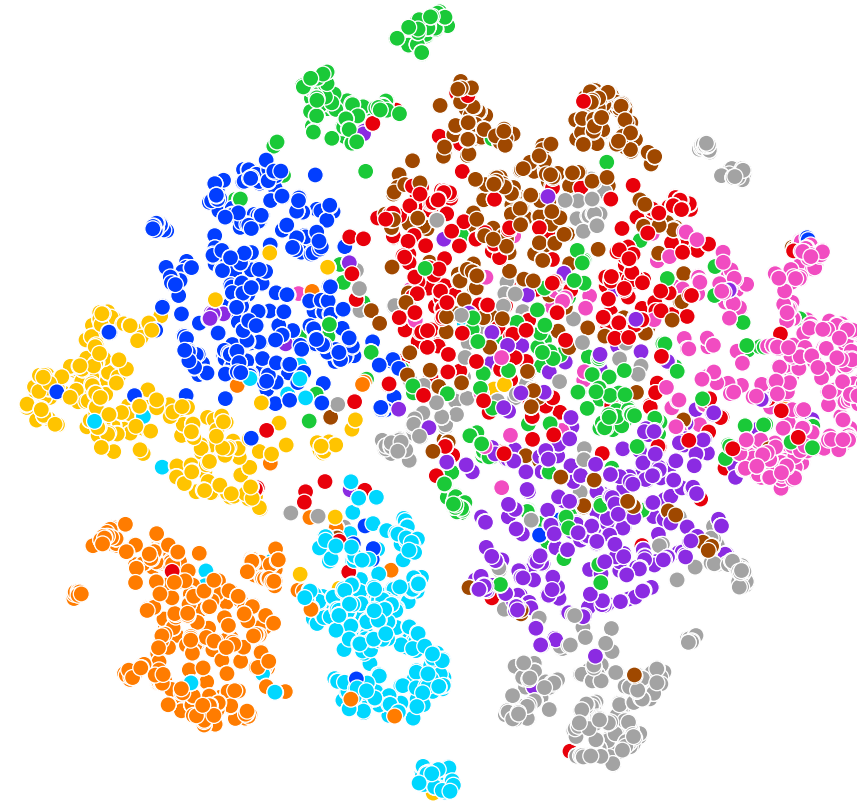

Time-step 3

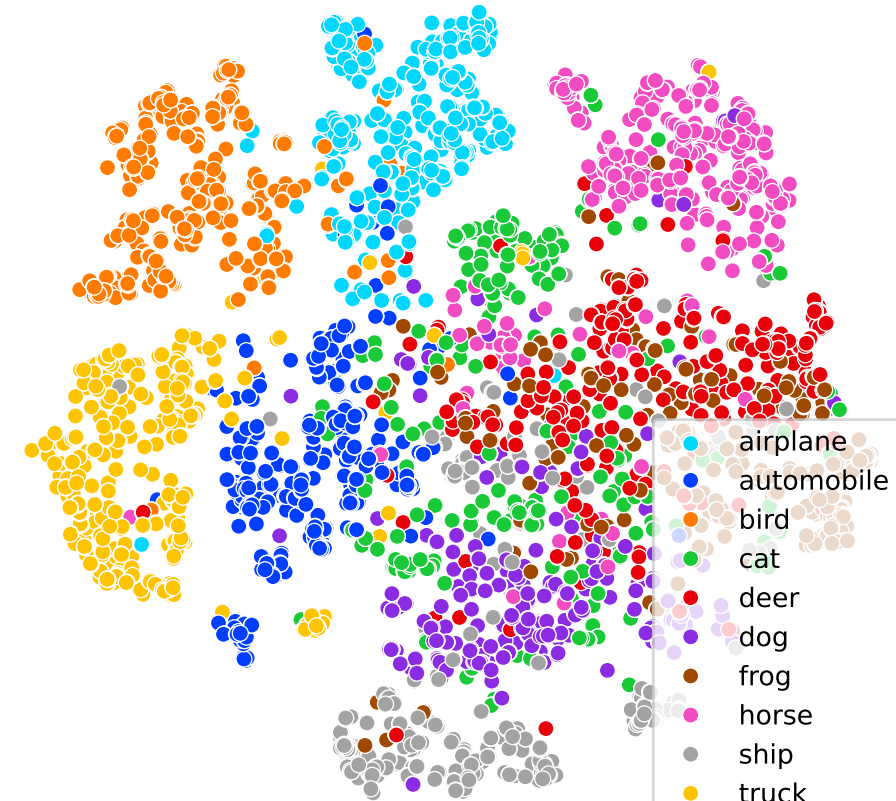

Supplement: supplementary_material [file tsne_plots_ab4.pdf › S4SN/res/save/tsne_plots_ab4.pdf]

Time-step 0

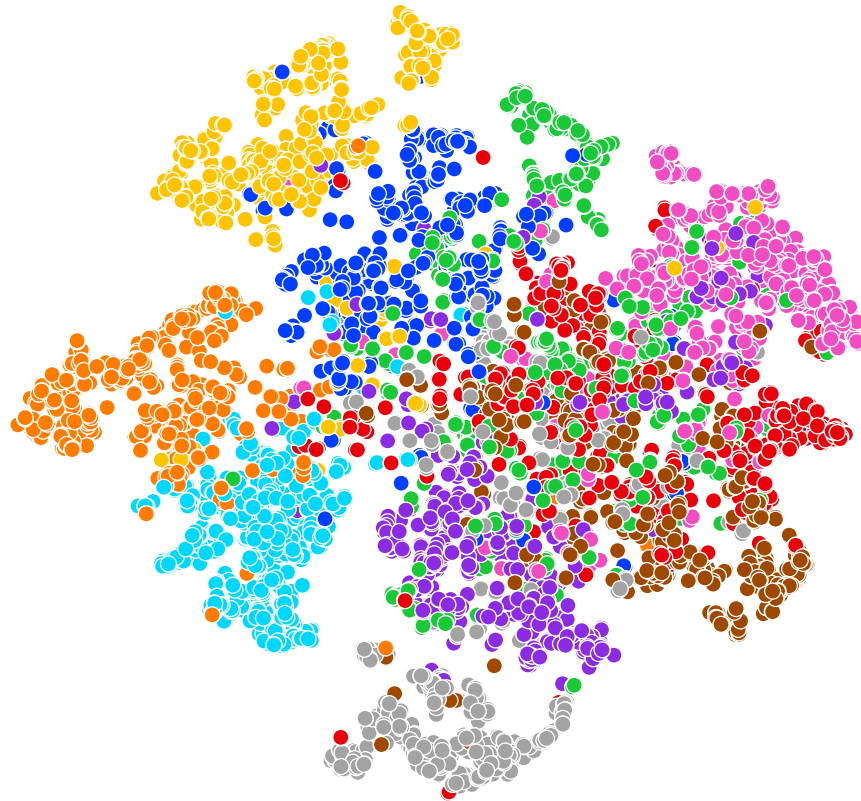

Time-step 1

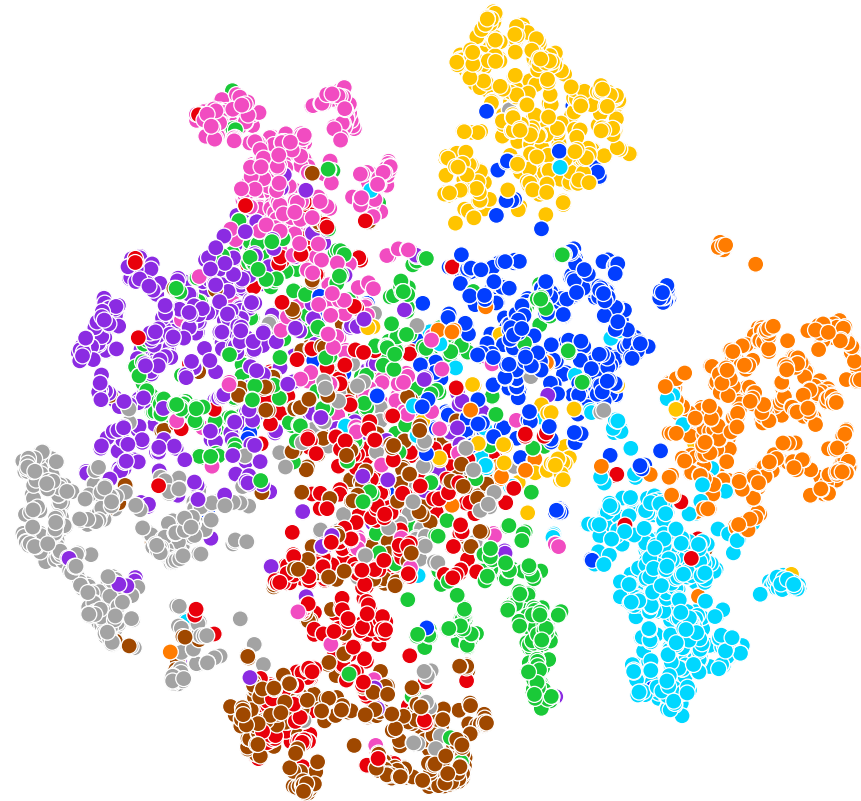

Time-step 2

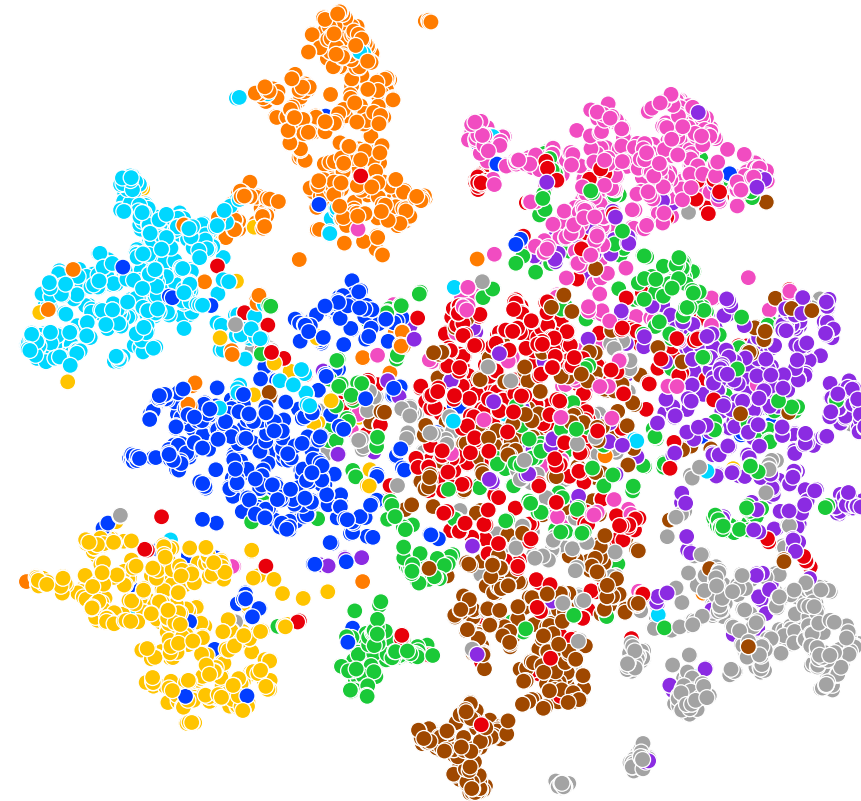

Time-step 3

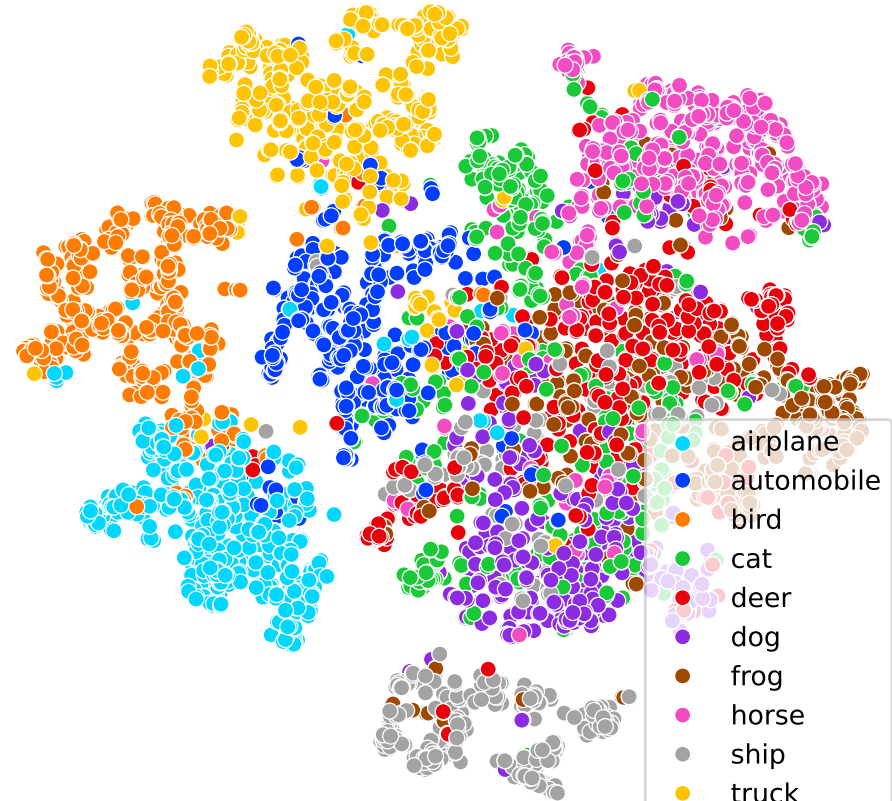

Supplement: supplementary_material [file tsne_plots_ab5.pdf › S4SN/res/save/tsne_plots_ab5.pdf]
